# Supplementary material for: Solvothermal method coupled with thermal decomposition for synthesis of non-stoichiometric BiO1.18I0.64 with excellent photocatalytic activity
Source: Royal Society of Chemistry journal article supplement (doi:10.1039/c5ra24200b), 2015-12-22
Supplement: c5ra24200b1.pdf [file c5ra24200b1.pdf]

## Solvothermal method coupled with thermal decomposition for synthesis of non-stoichiometric $\text{BiO}_{1.18}\text{I}_{0.64}$ with excellent photocatalytic activity

Yuan Guan<sup>a,b</sup> Shaomang Wang<sup>a,c\*</sup> Xin Wang<sup>b</sup> Cheng Sun<sup>c</sup> Yongbo Wang<sup>a</sup> Zeyu Ling<sup>a</sup>

<sup>a</sup> School of Huai De, School of Environment and Safety Engineering, Changzhou University, Changzhou 213164, PR China

<sup>b</sup> Key Laboratory for Soft Chemistry and Functional Materials of Ministry Education, Nanjing University of Science and Technology, Nanjing 210094, PR China

<sup>c</sup> State Key Laboratory of Pollution Control and Resource Reuse, School of the Environment, Nanjing University, Nanjing 210023, PR China

\*Corresponding author. Tel: +86 519 86330218

E-mail address: gywsm@cczu.edu.cn (S. M. Wang)

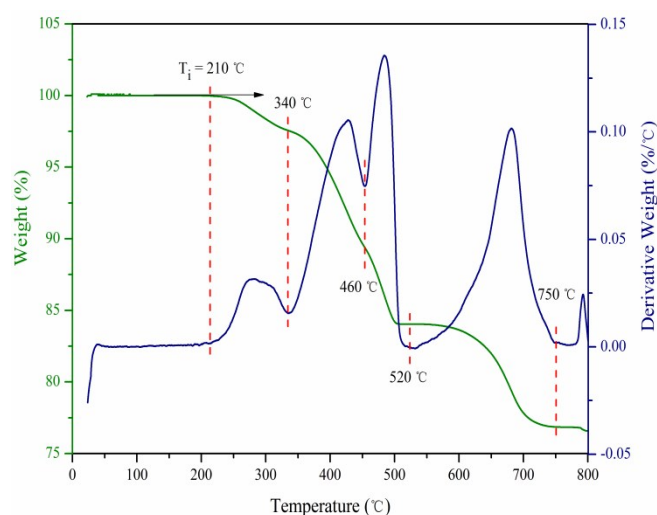

Figure S1. TG/DTG profile of BiOI-(400 °C/5 h).

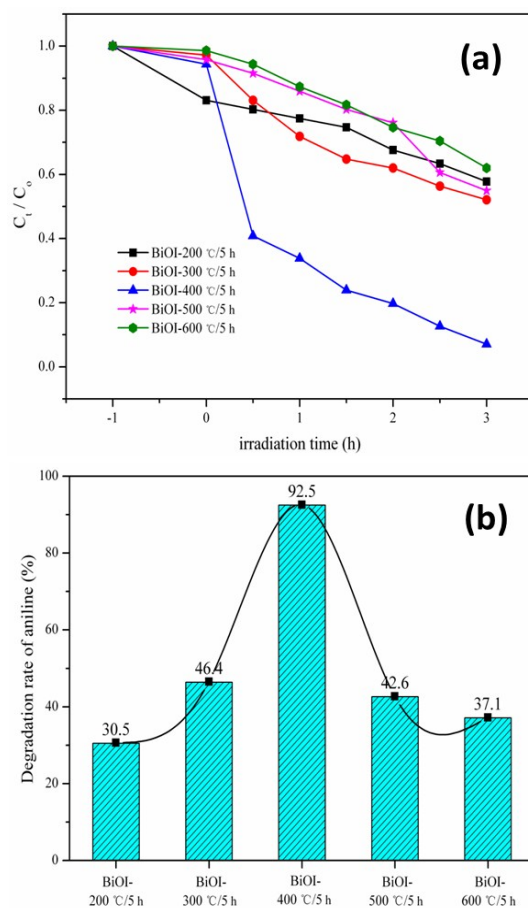

Figure S2. (a) Photocatalytic activities of BiOI-(200 °C, 300 °C, 400 °C, 500 °C and 600 °C/5 h) for aniline degradation under light irradiation; (b) Degradation rate of aniline over the photocatalysts after 3 h with light irradiation.

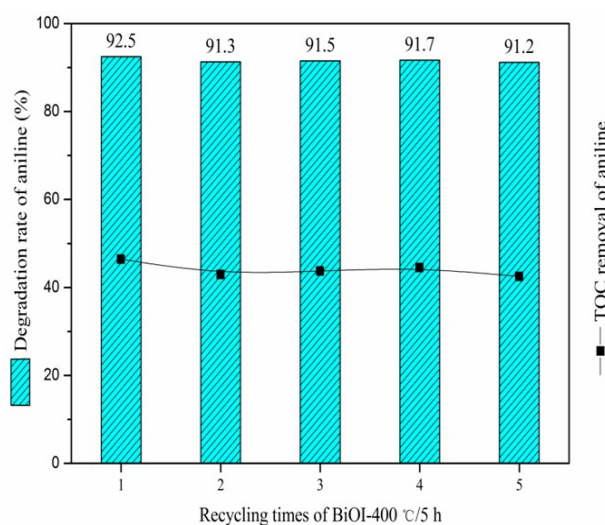

Figure S3. Five recycling runs of BiOI-(400 °C/5 h) for the degradation of aniline.

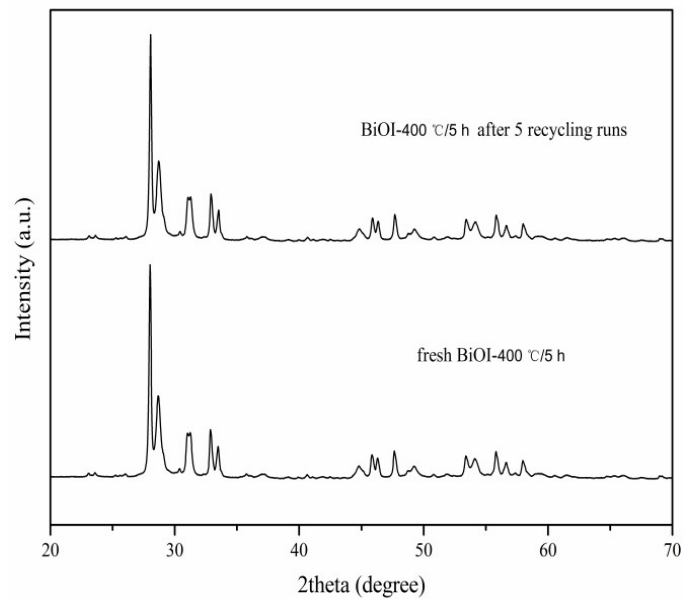

Figure S4. XRD patterns of fresh BiOI-(400 °C/5 h) and BiOI-(400 °C/5 h) after 5 recycling runs.

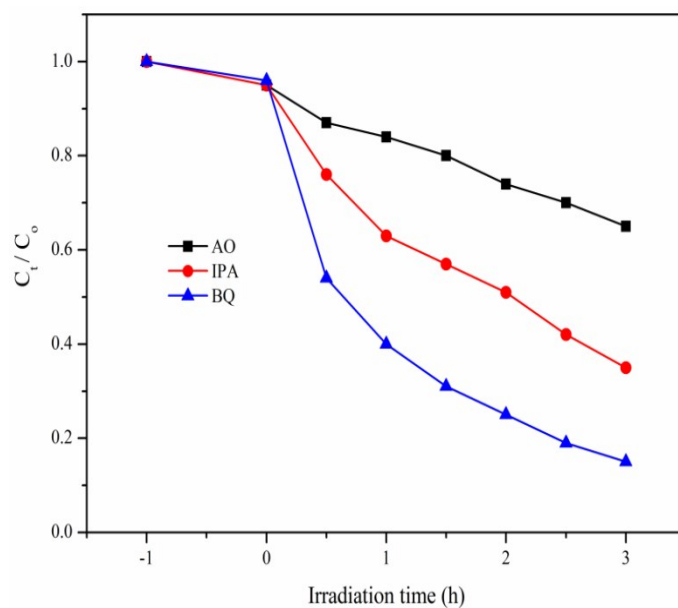

Figure S5. Photocatalytic activity of BiOI-(400 °C/5 h) for the degradation of aniline with different quenchers under light irradiation.

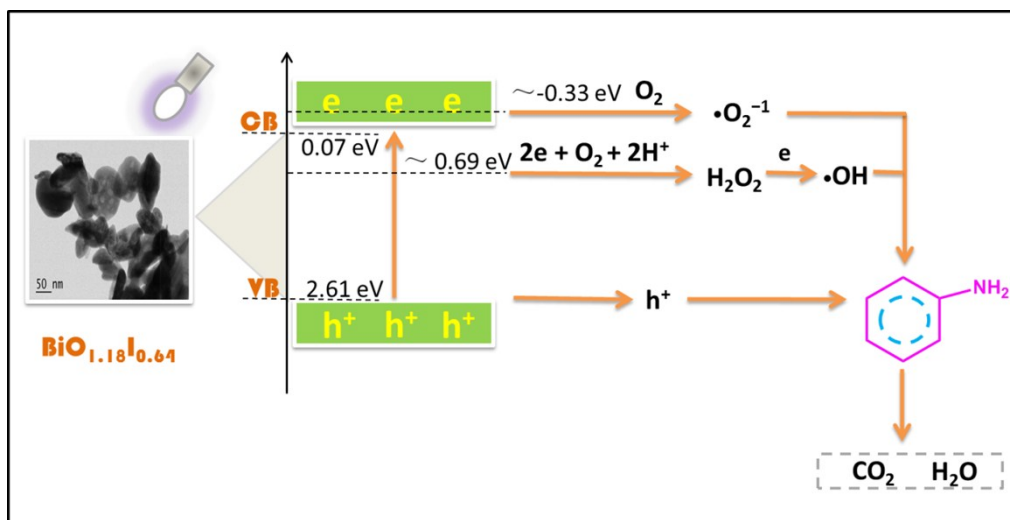

Figure S6. Photocatalytic degradation mechanism of aniline over BiOI-(400 °C/5 h).
